# Supplementary material
Source: publisher figshare collection journal article supplement (https://acs.figshare.com/ndownloader/files/9960139)
Supplement: Supplementary file 1 [file 9960139]

## Supporting Information

### **Electropolymerization porous aromatic framework film as hole-transport layer for inverted perovskite solar cells with superior stability**

Yudi Wang,<sup>†</sup> Shuhao Zhang,<sup>†</sup> Jionghua Wu,<sup>‡</sup> Kuan Liu,<sup>#</sup> Dongmei Li,<sup>‡</sup> Qingbo Meng,<sup>‡</sup> and Guangshan Zhu<sup>\*†⊥</sup>

<sup>†</sup>State Key Laboratory of Inorganic Synthesis and Preparative Chemistry, Jilin University, Changchun, 130012, PR China. E-mail: zhugs@jlu.edu.cn; Fax: +86 431-8516-8331, Tel: +86-431-85168887.

<sup>⊥</sup>Key Laboratory of Polyoxometalate Science of the Ministry of Education, Faculty of Chemistry, Northeast Normal University, Changchun, 130024, China.

<sup>‡</sup>Key Laboratory for Renewable Energy (CAS), Beijing Key Laboratory for New Energy Materials and Devices, Institute of Physics, Chinese Academy of Sciences, Beijing, 100190, China.

<sup>#</sup>Department of Materials Science and Engineering, College of Engineering, Key Laboratory of Polymer Chemistry and Physics of Ministry of Education, Peking University, Beijing, 100871, China

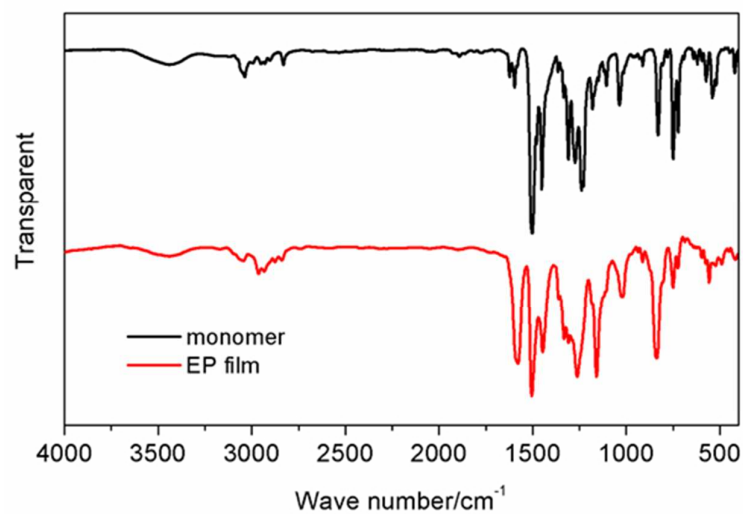

**Figure S1.** FTIR spectra of monomer M1 and EP PAF86 film.

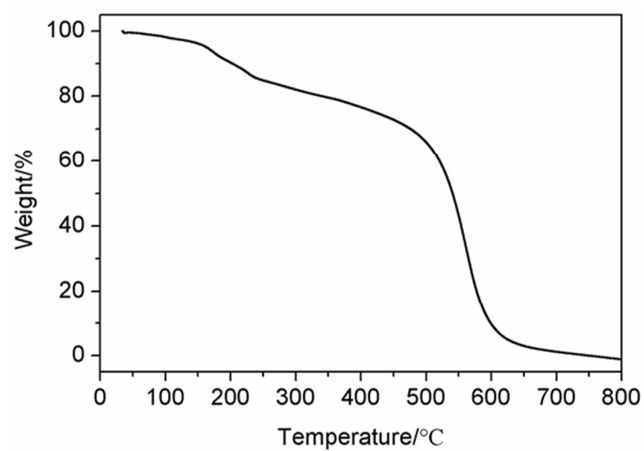

**Figure S2.** TGA curve of PAF86 film.

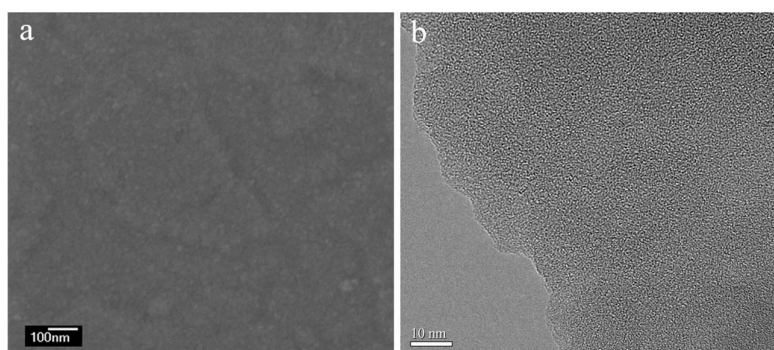

**Figure S3.** (a) SEM and (b) TEM images of the PAF86 film.

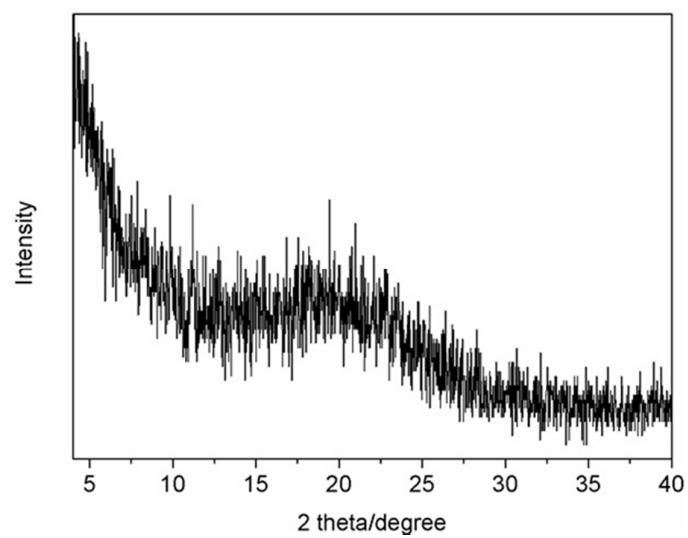

**Figure S4.** PXRD patterns of the PAF86 film.

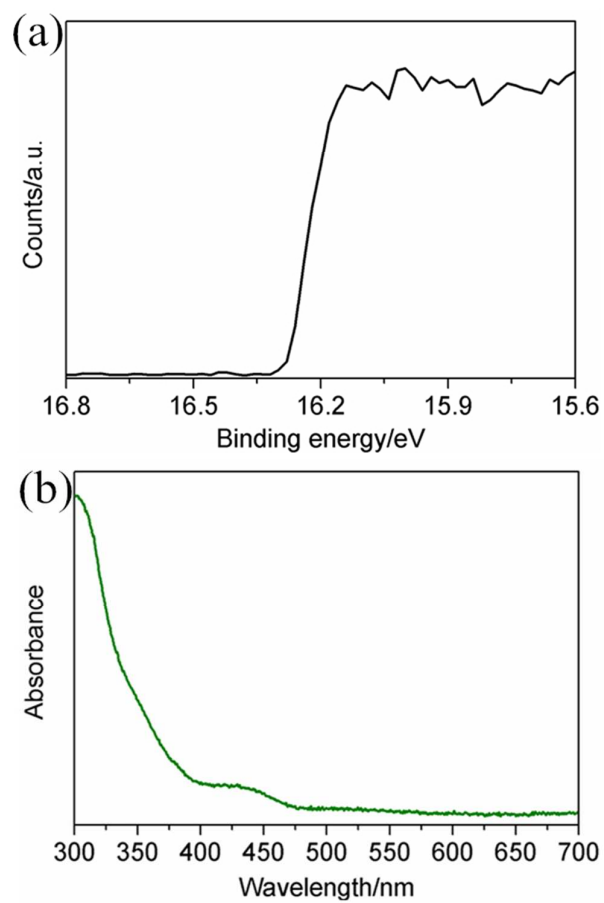

**Figure S5.** (a) UPS and (b) UV-Vis spectra of the PAF86 film.

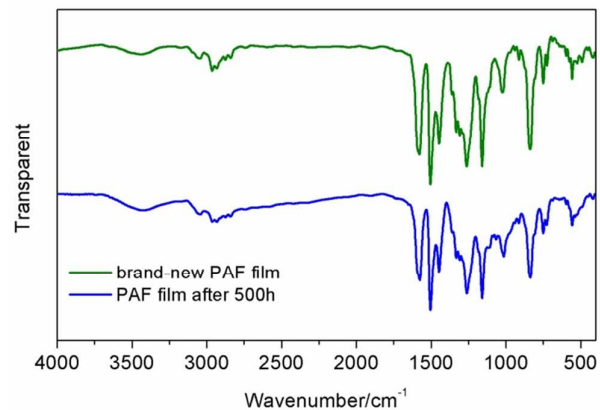

**Figure S6.** FTIR spectra for PAF film of brand-new and after 500h storage.

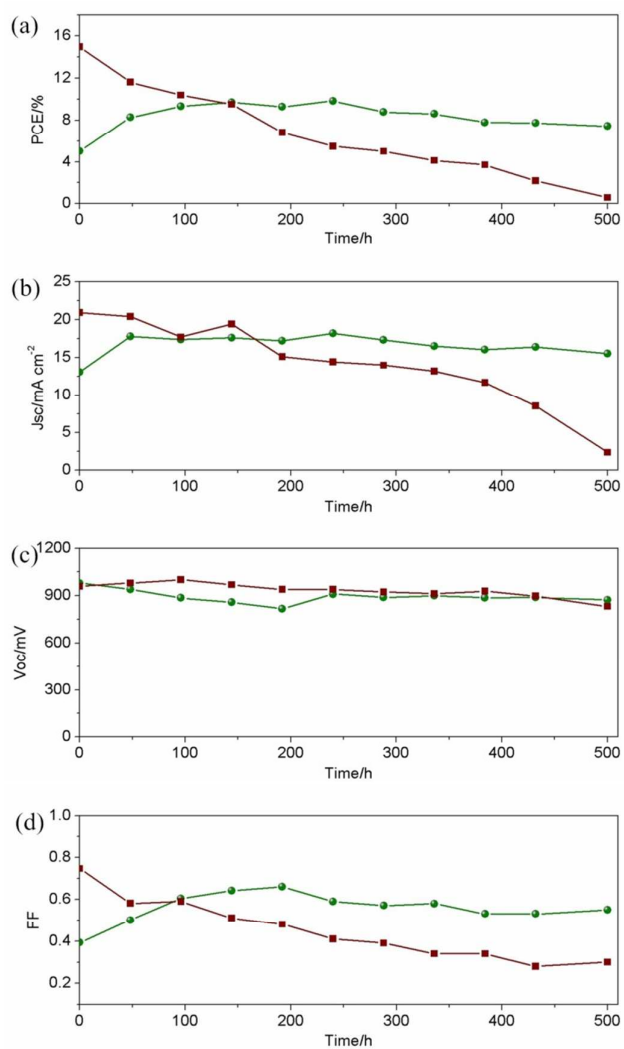

**Figure S7.** Photovoltaic parameters of PAF film-based (sphere colored olive) and PEDOT:PSS-based (cubic colored wine) devices variation during the duration without encapsulation in air at ambient conditions. (a) PCE; (b)  $J_{sc}$ ; (c)  $V_{oc}$ ; (d) FF.
